# Supplementary material for: Tuning of morphology and polymorphs of carbonate/polymer hybrids using photoreactive polymer templates
Source: Royal Society of Chemistry journal article supplement (doi:10.1039/c5ce00451a), 2015-01-01
Supplement: c5ce00451a1.pdf [file c5ce00451a1.pdf]

## Supplementary Information

### Tuning of morphology and polymorphs of carbonate/polymer hybrids using photoreactive polymer templates

Takeshi Sakamoto,\* Yosuke Nishimura and Takashi Kato\*

Department of Chemistry and Biotechnology, School of Engineering, The University of Tokyo, Hongo, Bunkyo-ku, Tokyo 113-8656, Japan

E-mail: t\_saka@chembio.t.u-tokyo.ac.jp; kato@chiral.t.u-tokyo.ac.jp

#### Effects of the ultraviolet (UV)-irradiation period on the matrices

The decrease in the absorption at 350 nm indicates the consumption of *trans*-4-styrylpyridinium (SbQ) groups.

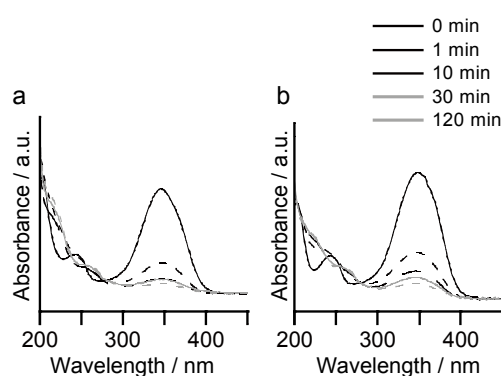

**Figure S1.** UV-Vis spectra of the (a) **P1** and (b) **P2** matrices during UV irradiation.

Figure S1 shows the spectral changes in the UV/Vis absorption of the PVA-SbQ films on quartz substrates during UV irradiation.

**Polymorphs of CaCO<sub>3</sub> crystals formed on the UV-irradiated PVA-SbQ matrices.**

Characteristic peaks for calcite: 1085 and 280 cm<sup>-1</sup>; aragonite: 1085 and 205 cm<sup>-1</sup>; vaterite: 1090, 1075 and 300 cm<sup>-1</sup>.

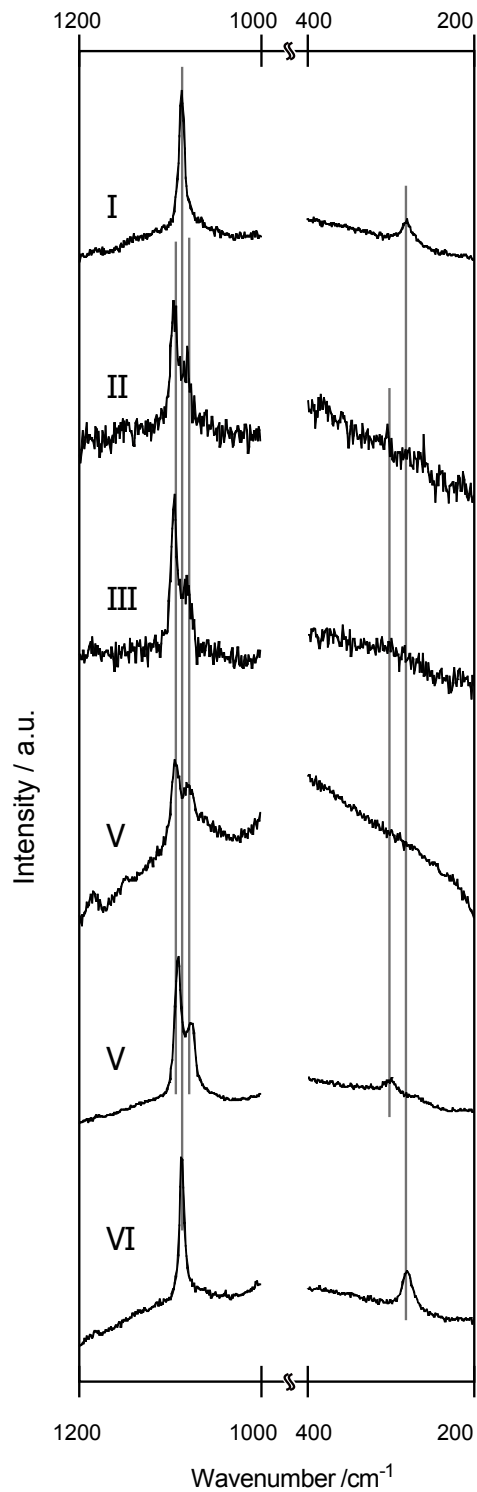

**Figure S2.** Raman spectra of the three kinds of CaCO<sub>3</sub> films I–V.

### Thickness of CaCO<sub>3</sub> crystals formed on the UV-irradiated PVA-SbQ matrices.

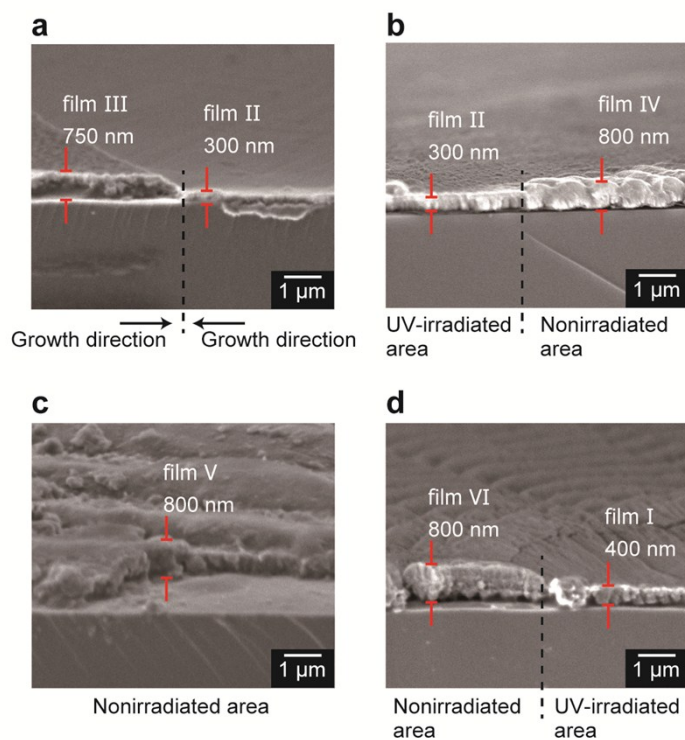

**Figure S3.** SEM images for cross-sections of the CaCO<sub>3</sub> crystals formed on (a,b,c) PVA-SbQ1 and (d) PVA-SbQ2 matrices.

Figure S3 shows cross-sectional SEM images of the CaCO<sub>3</sub> crystals grown on the PVA-SbQ matrices. The boundaries of the different films are presented in Figure S3(a, b, d).

## Crystallization of CaCO<sub>3</sub> on the annealed PVA-SbQ matrices

Characteristic Raman shift peaks for calcite: 1085 and 280 cm<sup>-1</sup>; aragonite: 1085 and 205 cm<sup>-1</sup>; vaterite: 1090, 1075 and 300 cm<sup>-1</sup>. Peaks at 875 cm<sup>-1</sup> and 745 cm<sup>-1</sup> of IR spectra are characteristic for vaterite.

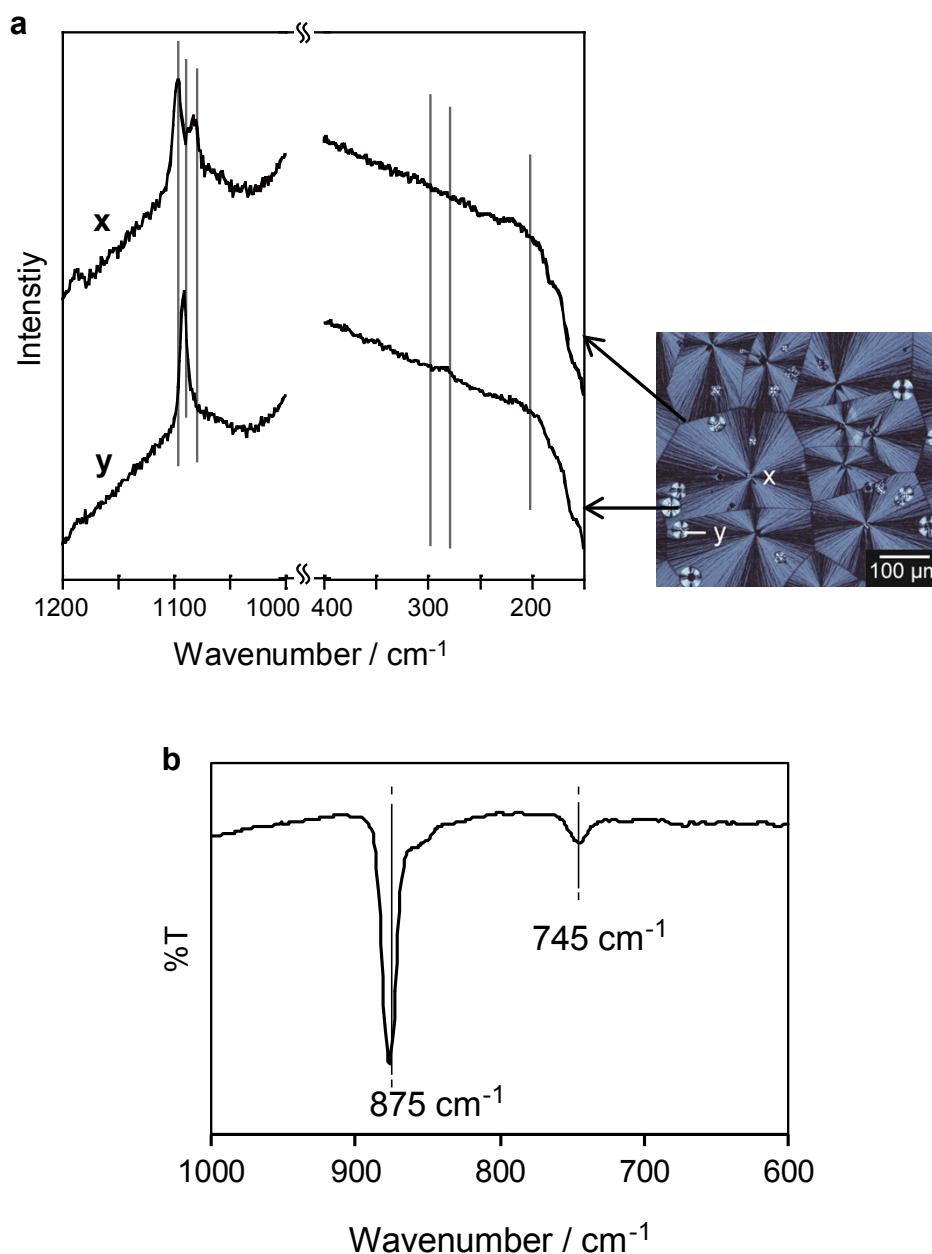

**Figure S4.** (a) Raman spectra of the CaCO<sub>3</sub> films formed on PVA-SbQ1 matrix prepared using thermal treatment (annealed at 180 °C for 10 min). (b) FT-IR spectrum of the CaCO<sub>3</sub> film formed on PVA-SbQ2 matrix prepared using thermal treatment (annealed at 180 °C for 10 min).

## Swelling behavior of the matrix

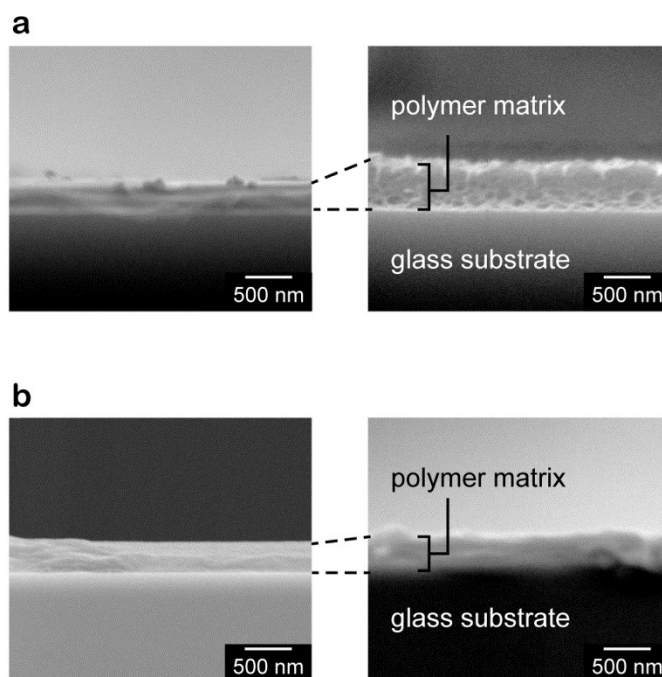

**Figure S5.** SEM images for the cross-sections of PVA-SbQ1 matrices UV-irradiated for (a) 10 and (b) 60 min (left) before and (after ) swelling process.

The samples in swollen states were prepared by incubation of the polymer matrices in water at 30 °C for 2 hour and subsequent freeze-drying. The PVA-SbQ matrix UV-irradiated for 10 min formed thicker and more distorted films than that irradiated for 60 min.

## XRD analyses of the SrCO<sub>3</sub> crystal films

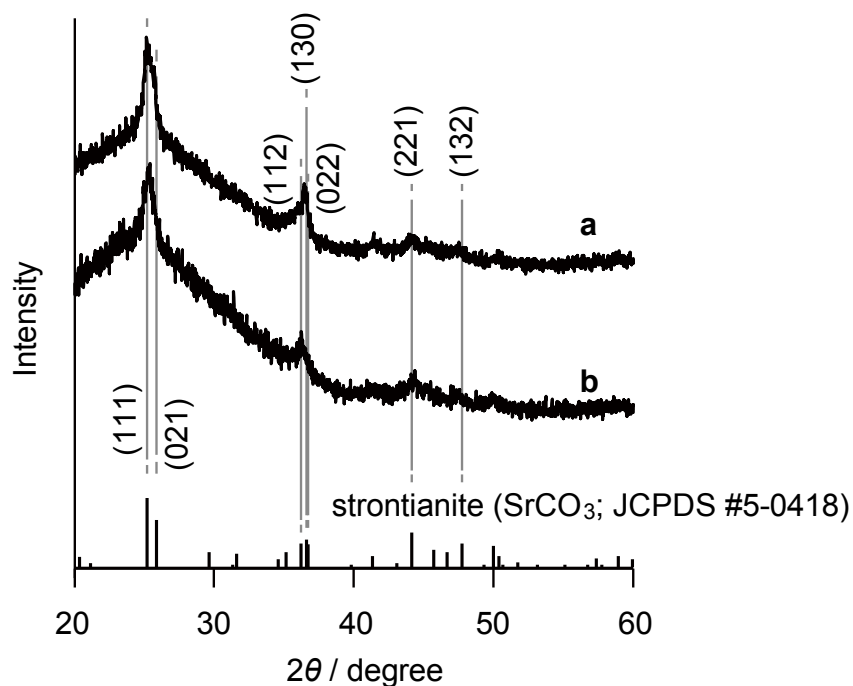

**Figure S6.** XRD patterns of the SrCO<sub>3</sub> films formed on the photoimaged (a) PVA-SbQ1 and (b) PVA-SbQ2 matrices.

## SrCO<sub>3</sub> on the annealed PVA-SbQ matrices

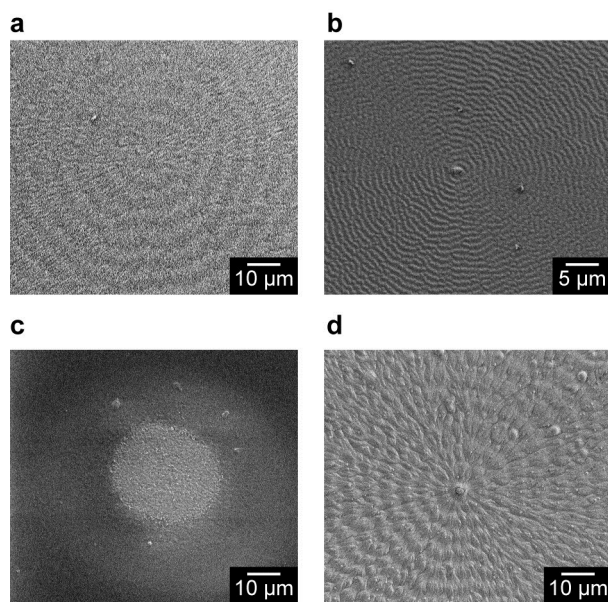

**Figure S7.** SEM images of SrCO<sub>3</sub> crystals formed on (a,b) PVA-SbQ1 and (c,d) PVA-SbQ2 matrices prepared by thermal treatment. Annealing temperature of the matrix: (a,c) 160 °C; (b,d) 175 °C.
